# Supplementary material for: Contribution of Live Video to Physicians’ Remote Assessment of Suspected COVID19 Patients in an Emergency Medical Communication Centre: A Retrospective Study and Web-Based Survey
Source: Preprints.org preprint supplement (doi:10.20944/preprints202301.0426.v1), 2023-01-24
Supplement: Supplementary file 2 [file supplementary]

**Appendix 1:** Web-based survey questionnaire: The value of live video calling in the context of assessments of suspected or confirmed COVID19 patients.

|   | Questions et réponses (FR)                                                                                                                                                                                                                                                                                                                                                                                                                                                                                     | Questions and answers (EN)                                                                                                                                                                                                                                                                                                                                                                                                                                              |
|---|----------------------------------------------------------------------------------------------------------------------------------------------------------------------------------------------------------------------------------------------------------------------------------------------------------------------------------------------------------------------------------------------------------------------------------------------------------------------------------------------------------------|-------------------------------------------------------------------------------------------------------------------------------------------------------------------------------------------------------------------------------------------------------------------------------------------------------------------------------------------------------------------------------------------------------------------------------------------------------------------------|
| 1 | <b>Numéro d'évènement</b>                                                                                                                                                                                                                                                                                                                                                                                                                                                                                      | <b>Event Number</b>                                                                                                                                                                                                                                                                                                                                                                                                                                                     |
| 2 | <b>Date et heure de l'appel vidéo en direct</b>                                                                                                                                                                                                                                                                                                                                                                                                                                                                | <b>Date and time of the live video call</b>                                                                                                                                                                                                                                                                                                                                                                                                                             |
| 3 | <b>Nom du médecin*</b>                                                                                                                                                                                                                                                                                                                                                                                                                                                                                         | <b>Name of physician</b>                                                                                                                                                                                                                                                                                                                                                                                                                                                |
| 4 | <b>Sexe du patient (Homme /Femme)</b>                                                                                                                                                                                                                                                                                                                                                                                                                                                                          | <b>Gender of patient (Male/Female)</b>                                                                                                                                                                                                                                                                                                                                                                                                                                  |
| 5 | <b>Age du patient</b>                                                                                                                                                                                                                                                                                                                                                                                                                                                                                          | <b>Age of patient</b>                                                                                                                                                                                                                                                                                                                                                                                                                                                   |
| 6 | <b>Quel est le contexte de l'appel vidéo en direct ?</b><br>(une seule réponse) <ul style="list-style-type: none"> <li>- Patient seul à domicile</li> <li>- Patient à domicile, avec présence d'une autre personne sur place</li> <li>- Patient à domicile, avec un professionnel de santé sur place (hors présence d'une ambulance)</li> <li>- Patient déjà dans un centre médical (hors présence d'une ambulance)</li> <li>- Ambulance déjà sur place</li> <li>- Ambulance et SMUR déjà sur place</li> </ul> | <b>What is the context of the live video call?</b><br>(only one possible answer) <ul style="list-style-type: none"> <li>- Patient alone at home</li> <li>- Patient at home, with another person present</li> <li>- Patient at home, with a health professional on site (not including an ambulance)</li> <li>- Patient already in a medical centre (without an ambulance)</li> <li>- Ambulance already on site</li> <li>- Ambulance and SMUR already on site</li> </ul> |
| 7 | <b>Quelle est votre rôle* ?</b> (une seule réponse) <ul style="list-style-type: none"> <li>- Médecin trieur 2<sup>ème</sup> ligne</li> <li>- Médecin effectuant un rappel à 24h</li> <li>- Régulateur d'urgence</li> <li>- Etudiants en médecine de 1<sup>ère</sup> ligne</li> <li>- Etudiants effectuant un rappel à 24h</li> <li>- Autre</li> </ul>                                                                                                                                                          | <b>What is your role*?</b> (only one possible answer) <ul style="list-style-type: none"> <li>- Physician 2nd line</li> <li>- Physician carrying out a 24-hour recall</li> <li>- Emergency Medical Dispatcher</li> <li>- 1st line medical students</li> <li>- Student 24-hour recall</li> <li>- Other</li> </ul>                                                                                                                                                         |
| 8 | <b>Pour quelle raison avez-vous utilisé la vidéo en direct ?</b> (une seule réponse) <ul style="list-style-type: none"> <li>- Difficulté à communiquer</li> <li>- Evaluation du contexte psycho-social</li> <li>- Evaluation de l'état général du patient</li> <li>- Evaluation de la respiration du patient</li> <li>- Evaluation des paramètres vitaux (hors respiration)</li> <li>- Evaluation de l'électrocardiogramme ou d'un autre examen paraclinique</li> <li>- Autre</li> </ul>                       | <b>Why did you use live video?</b> (only one possible answer) <ul style="list-style-type: none"> <li>- Difficulty to communicate</li> <li>- Assessment of psycho-social context</li> <li>- Assessment of patient's general condition</li> <li>- Assessment of the patient's breathing</li> <li>- Assessment of vital parameters (excluding respiration)</li> <li>- Assessment of electrocardiogram or other paraclinical examination</li> <li>- Other</li> </ul>        |

|    |                                                                                                                                                                                                                                                                                                                                                                   |                                                                                                                                                                                                                                                                                                                                             |
|----|-------------------------------------------------------------------------------------------------------------------------------------------------------------------------------------------------------------------------------------------------------------------------------------------------------------------------------------------------------------------|---------------------------------------------------------------------------------------------------------------------------------------------------------------------------------------------------------------------------------------------------------------------------------------------------------------------------------------------|
| 9  | <p><b>Selon vous, quelle est l'acceptation de l'utilisation par la personne en ligne ?</b> (une seule réponse)</p> <ul style="list-style-type: none"> <li>- Pauvre</li> <li>- Médiocre</li> <li>- Acceptable</li> <li>- Bon</li> <li>- Très bon</li> <li>- Excellent</li> <li>- Autre</li> </ul>                                                                  | <p><b>What do you think is the acceptance of the use by the person online?</b> (only one possible answer)</p> <ul style="list-style-type: none"> <li>- Poor</li> <li>- Poor</li> <li>- Acceptable</li> <li>- Good</li> <li>- Very good</li> <li>- Excellent</li> <li>- Other</li> </ul>                                                     |
| 10 | <p><b>Comment jugez-vous la facilité d'utilisation de l'outil vidéo en direct (de votre côté) ?</b> (une seule réponse)</p> <ul style="list-style-type: none"> <li>- Pauvre</li> <li>- Médiocre</li> <li>- Acceptable</li> <li>- Bon</li> <li>- Très bon</li> <li>- Excellent</li> <li>- Autre</li> </ul>                                                         | <p><b>How do you rate the ease of use of the live video tool (on your side)?</b> (only one possible answer)</p> <ul style="list-style-type: none"> <li>- Poor</li> <li>- Poor</li> <li>- Acceptable</li> <li>- Good</li> <li>- Very good</li> <li>- Excellent</li> <li>- Other</li> </ul>                                                   |
| 11 | <p><b>Quel problème technique avez-vous rencontré ?</b> (une seule réponse)</p> <ul style="list-style-type: none"> <li>- Echec réception SMS</li> <li>- Impossibilité d'activer la caméra</li> <li>- Ligne de mauvaise qualité</li> <li>- Ligne interrompue</li> <li>- Absence d'image</li> <li>- Test</li> <li>- Autre</li> </ul>                                | <p><b>What technical problem did you encounter?</b> (only one possible answer)</p> <ul style="list-style-type: none"> <li>- Failed to receive SMS</li> <li>- Impossible to activate the camera</li> <li>- Poor quality line</li> <li>- Line interrupted</li> <li>- No image</li> <li>- Test**</li> <li>- Other</li> </ul>                   |
| 12 | <p><b>Quel problème d'utilisation avez-vous rencontré ?</b> (une seule réponse)</p> <ul style="list-style-type: none"> <li>- Coupure du téléphone (audio)</li> <li>- Coupure de la vidéo</li> <li>- Autre</li> </ul>                                                                                                                                              | <p><b>What user problem did you encounter?</b> (only one possible answer)</p> <ul style="list-style-type: none"> <li>- Telephone (audio) cut off</li> <li>- Video cut off</li> <li>- Other</li> </ul>                                                                                                                                       |
| 13 | <p><b>Quelle décision avez-vous prise à la suite de votre évaluation avec la vidéo en direct ?</b> (une seule réponse)</p> <ul style="list-style-type: none"> <li>- Envoi d'une ambulance</li> <li>- Envoi d'un médecin de garde à domicile</li> <li>- Patient laissé sur site avec conseils</li> <li>- Conseil de consultation par ses propres moyens</li> </ul> | <p><b>What decision did you make as a result of your assessment with live video?</b> (only one possible answer)</p> <ul style="list-style-type: none"> <li>- Dispatching an ambulance</li> <li>- Dispatching an on-call doctor to the home</li> <li>- Patient left on site with advice</li> <li>- Advised to consult by own mean</li> </ul> |
| 14 | <p><b>Quelle a été votre décision lorsque l'ambulance est déjà sur site ?</b> (une seule réponse)</p>                                                                                                                                                                                                                                                             | <p><b>What was your decision when the ambulance is already on site?</b> (only one possible answer)</p>                                                                                                                                                                                                                                      |

|    |                                                                                                                                                                                                                                                                                  |                                                                                                                                                                                                                                                                |
|----|----------------------------------------------------------------------------------------------------------------------------------------------------------------------------------------------------------------------------------------------------------------------------------|----------------------------------------------------------------------------------------------------------------------------------------------------------------------------------------------------------------------------------------------------------------|
|    | <ul style="list-style-type: none"> <li>- Transport en ambulance</li> <li>- Patient laissé sur site</li> <li>- Patient laissé sur site et envoi ultérieur d'un médecin de garde</li> <li>- Patient laissé sur site avec conseil de consultation par ses propres moyens</li> </ul> | <ul style="list-style-type: none"> <li>- Transport by ambulance</li> <li>- Patient left on site</li> <li>- Patient left on site with subsequent dispatch of a physician on call</li> <li>- Patient left on site with advice to consult by own means</li> </ul> |
| 15 | <b>Est-ce-que la vidéo en direct a influencé votre décision ?</b> (une seule réponse) <ul style="list-style-type: none"> <li>- Oui</li> <li>- Non</li> <li>- Vidéo impossible ou de qualité insuffisante</li> </ul>                                                              | <b>Did the live video influence your decision?</b> (only one possible answer) <ul style="list-style-type: none"> <li>- Yes</li> <li>- No</li> <li>- Video not possible or of insufficient quality</li> </ul>                                                   |
| 16 | <b>Selon vous, quel a été l'apport de la vidéo dans votre décision ?</b> (question ouverte)                                                                                                                                                                                      | <b>In your opinion, how did the video influence your decision?</b> (open question)                                                                                                                                                                             |
