# Supplementary figures and images for: Contribution of Live Video to Physicians’ Remote Assessment of Suspected COVID19 Patients in an Emergency Medical Communication Centre: A Retrospective Study and Web-Based Survey
Source: Preprints.org preprint supplement (doi:10.20944/preprints202301.0426.v1), 2023-01-24

## Appendix 2: Monthly flow of remote assessments performed by physicians.

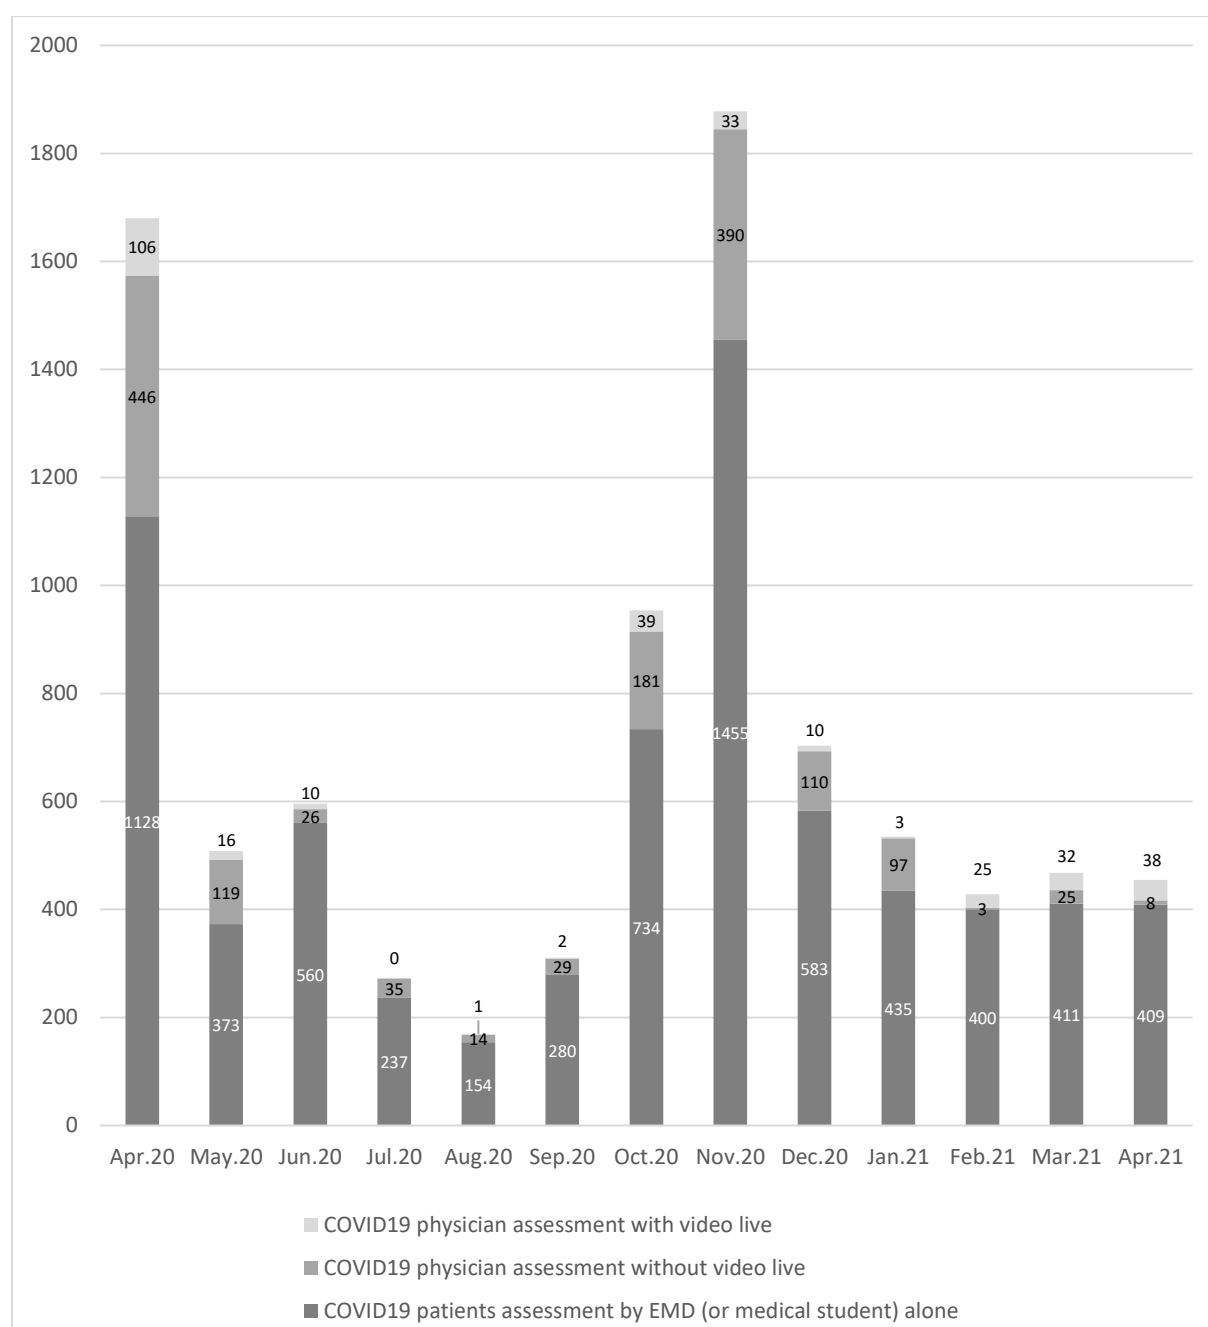

Supplement: Supplementary file 1 [file supplementary]
